# Supplementary material for: Ultra-dense dislocations stabilized in high entropy oxide ceramics
Source: PubMed Central journal article supplement (PMC9130511; doi:10.1038/s41467-022-30260-4), 2022-05-24
Supplement: 41467_2022_30260_MOESM3_ESM.pdf [file 41467_2022_30260_MOESM3_ESM.pdf]

## **Description of Additional Supplementary Files**

File Name: Supplementary Movie 1

Description: Crack propagation behavior in the  $\text{Gd}_2\text{Zr}_2\text{O}_7$  model.

File Name: Supplementary Movie 2

Description: Crack bridging in HEPO during propagation process.

File Name: Supplementary Movie 3

Description: Crack deflection in HEPO during propagation process.
